# Supplementary material
Source: Elsevier journal article supplement (https://www.sciencedirect.com/science/article/pii/S0366317519300329)
Supplement: mmc1 [file S0366317519300329:mmc1.docx]

Effect of the pH pre-adjustment on the formation of In2W3O12 andIn6WO12 powders: Cluster coordination and optical band gap

R.T. de Paiva1, I.C. Nogueira2, J.C. Sczancoski3, P.S. Lemos3, J.M.E. Matos1, R.S. Santos5, E. Longo4, and L.S. Cavalcante1,5*

*1Programa de Pós-Graduação em Ciência dos Materiais-PPCM,Universidade Federal do Piauí, Teresina–PI, 64049-550, Brazil*

*2ICE-Universidade Federal do Amazonas, Av. Rodrigo Otávio Japiim, P.O. Box 670, 69077-000, Manaus–AM, Brazil*

*3DQ-UFSCar,Universidade Federal de São Carlos, P.O. Box 676, São Carlos–SP, 13565-905, Brazil*

*4Departamento de Físico-Química, Universidade Estadual Paulista, 14800-060, Araraquara–SP, Brazil*

*5PPGQ-GERATEC, Universidade Estadual do Piauí, Rua: João Cabral, N. 2231, P.O. Box 381, 64002-150, Teresina–PI, Brazil*

*Keywords: In2W3O12, In6WO12, Rietveld refinement, Clusters, Optical band gap*

Efecto del preajuste de pH en la formación de polvos In2W3O12 e In6WO12: Coordinación de grupo y banda óptica

R.T. de Paiva1, I.C. Nogueira2, J.C. Sczancoski3, P.S. Lemos3, J.M.E. Matos1, R.S. Santos5, E. Longo4, and L.S. Cavalcante1,5*

*1Programa de Pós-Graduação em Ciência dos Materiais-PPCM,Universidade Federal do Piauí, Teresina–PI, 64049-550, Brazil*

*2ICE-Universidade Federal do Amazonas, Av. Rodrigo Otávio Japiim, P.O. Box 670, 69077-000, Manaus–AM, Brazil*

*3DQ-UFSCar,Universidade Federal de São Carlos, P.O. Box 676, São Carlos–SP, 13565-905, Brazil*

*4Departamento de Físico-Química, Universidade Estadual Paulista, 14800-060, Araraquara–SP, Brazil*

*Palabras clave:* In2W3O12, In6WO12, refinamiento Rietveld, Clusters, brecha de banda óptica

____________________________________________________________________________________________________

* Telefono: +55 86 3221-4749, Móvel: +55 86 99940-9556. Dirección de correo electrónico: [laeciosc@gmail.com](mailto:laeciosc@gmail.com) (L.S. Cavalcante)

*Preimpresión reenviado a BOLETÍN DE LA SOCIEDAD ESPAÑOLA DE Cerámica y Vidrio Febrero 09, 2019*

***Electronic Supplementary Material***

Fig. SM1 illustrate XRD patterns of the amorphous system synthesized by the co-precipitation method (363 K for 1 h) by using a pH at 4, without any heat treatment.

**
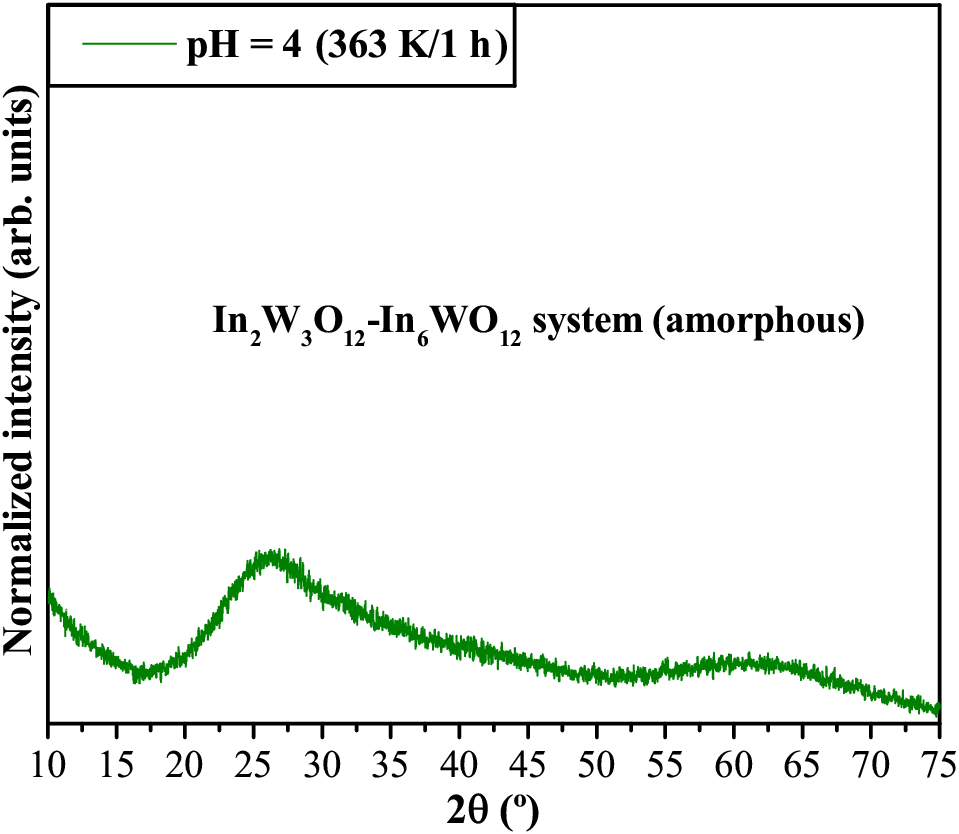
**

**Fig. SM1:** XRD patterns of In2W3O12-In6WO12 (amorphous) synthesized at 363 K for 1 h with pH at 4.

This figure revealed that the In2W3O12−In6WO12 precipitates formed at 363 K for 1 h have an amorphous state. Particularly, this powder have several defects as well as a high degree of structural disordering.

Thermogravimetric analysis (TGA) was carried out in a TGA-50 thermal analyzer (Shimadzu, Japan). These thermal measurements were performed in a temperature range from 298 K to 1123 K under synthetic air ﬂow (30 cm3/min), maintaining a heating rate of 278 K/min. TGA analysis is shown in Fig. SM2.


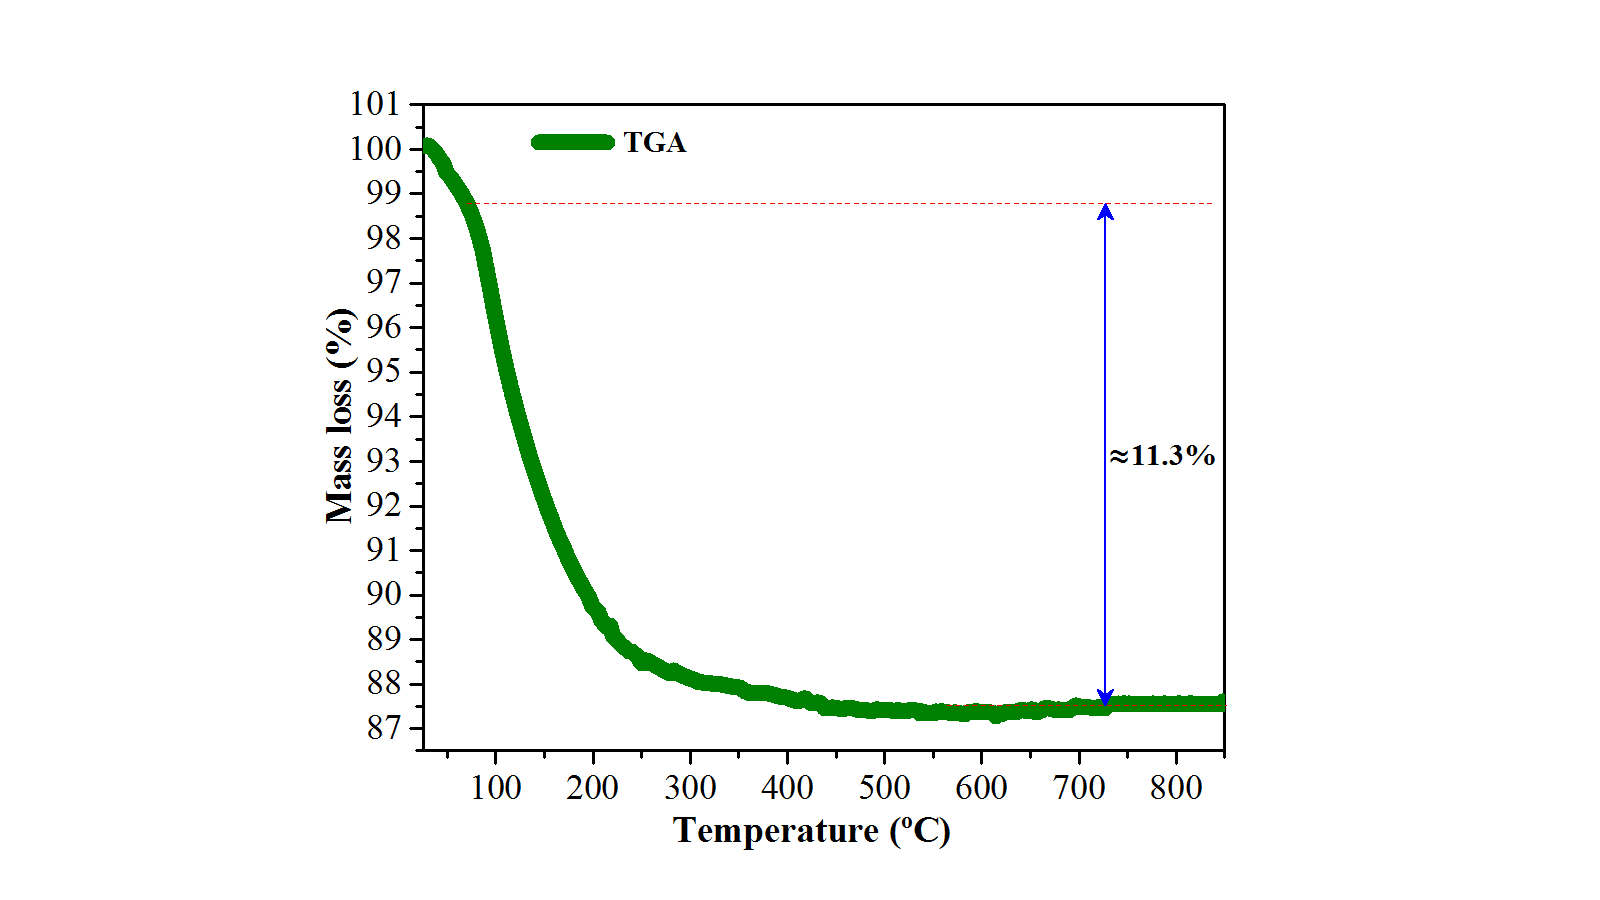


**Fig. SM2:** TGA curve from 298 K to 1123 K for In2W3O12−In6WO12 precipitates synthesized at 363 K for 1 h with pH at 4.

As it can be noted in Fig. SM2, the TGA curves indicates a mass loss of approximately 11.3 % from 348 K to 1073 K, which is related to dehydration or evaporation of the residual aqueous in In2W3O12−In6WO12 amorphous.
